# Supplementary material for: Seed layer formation determines photocurrent response of hydrothermally-grown WO3 photoanodes
Source: Royal Society of Chemistry journal article supplement (doi:10.1039/d2se01490d), 2023-01-01
Supplement: d2se01490d1.pdf [file d2se01490d1.pdf]

## Supporting Information

### Seed layer formation determines photocurrent response of hydrothermally-grown WO<sub>3</sub> photoanodes

Mirco Ade, Lion Schumacher, Roland Marschall\*

Department of Chemistry, University of Bayreuth, 95440 Bayreuth, Germany

E-mail: [roland.marschall@uni-bayreuth.de](mailto:roland.marschall@uni-bayreuth.de)

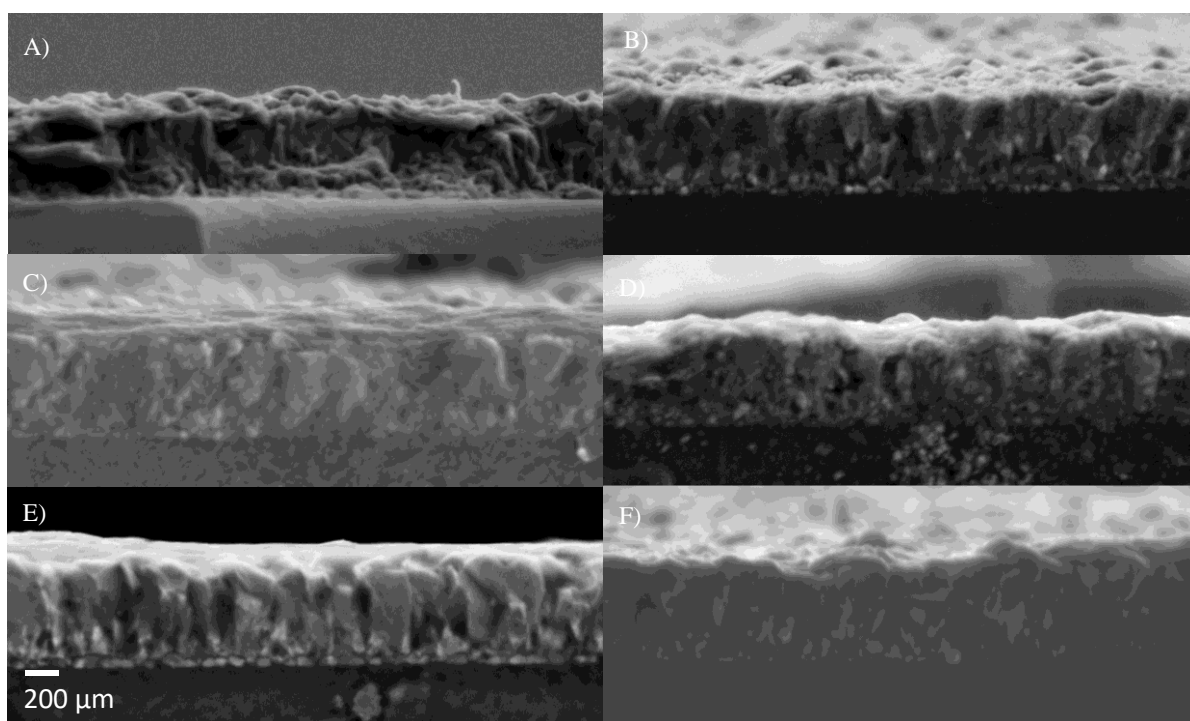

**Figure S1.** Cross Section SEM images of the seed layer prepared by static spin coating.

**Table S1:** XPS results of the measured seed layers synthesized via static spin coating.

|   | Static Spin Coating |          |              |
|---|---------------------|----------|--------------|
|   | W / At%             | Sn / At% | W / Sn ratio |
| A | 11.60               | 8.97     | 1.29         |
| B | 11.84               | 9.49     | 1.25         |
| C | 11.49               | 7.17     | 1.60         |
| D | 19.58               | -        |              |
| E | 10.3                | 12.73    | 0.81         |
| F | 10.5                | 11.74    | 0.89         |

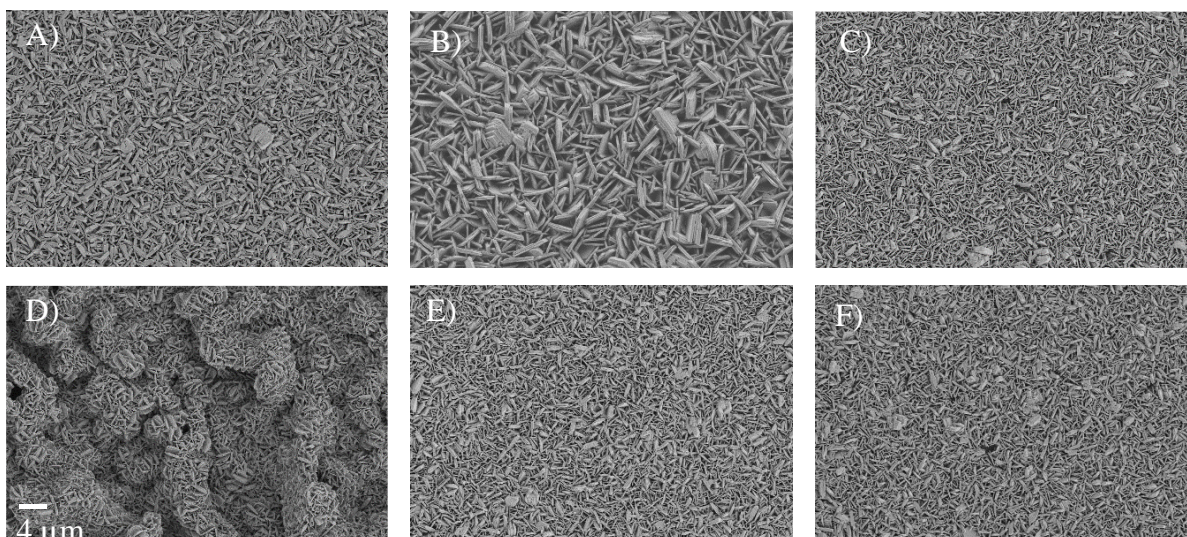

**Figure S2.** Overview SEM images of hydrothermally grown  $\text{WO}_3$  films from seed layer after static spin coating. The scale is the same for every measurement.

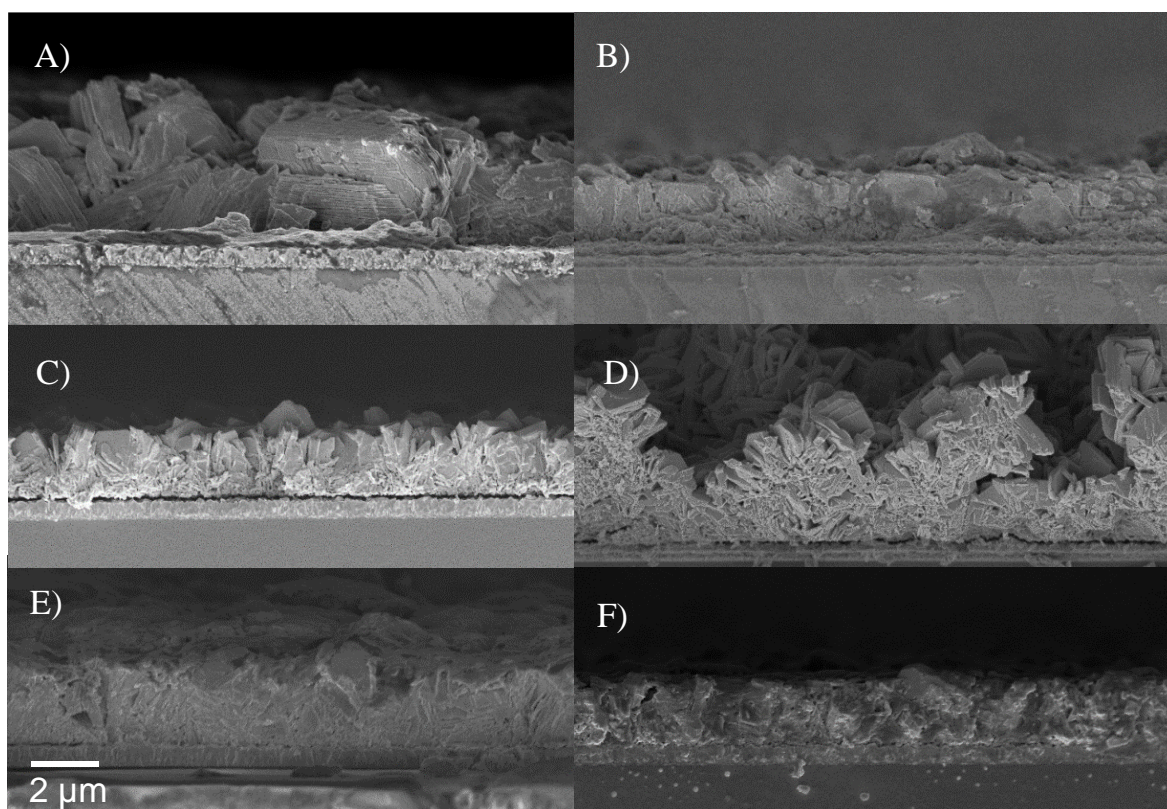

**Figure S3.** Cross Section SEM images grown  $\text{WO}_3$  samples from seed layers after static spin coating. The scale is the same for every measurement.

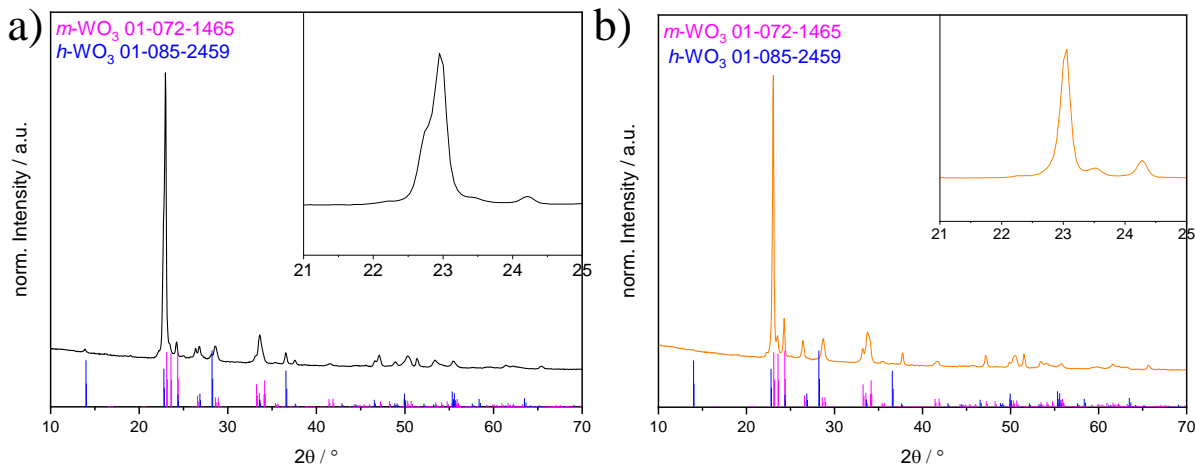

**Figure S4.** Detailed diffractogram of grown  $\text{WO}_3$  sample synthesized from seed layers after static spin coating a) at 2000 rpm/30 s and b) at 5000 rpm/30 s. Inset displays a magnification.

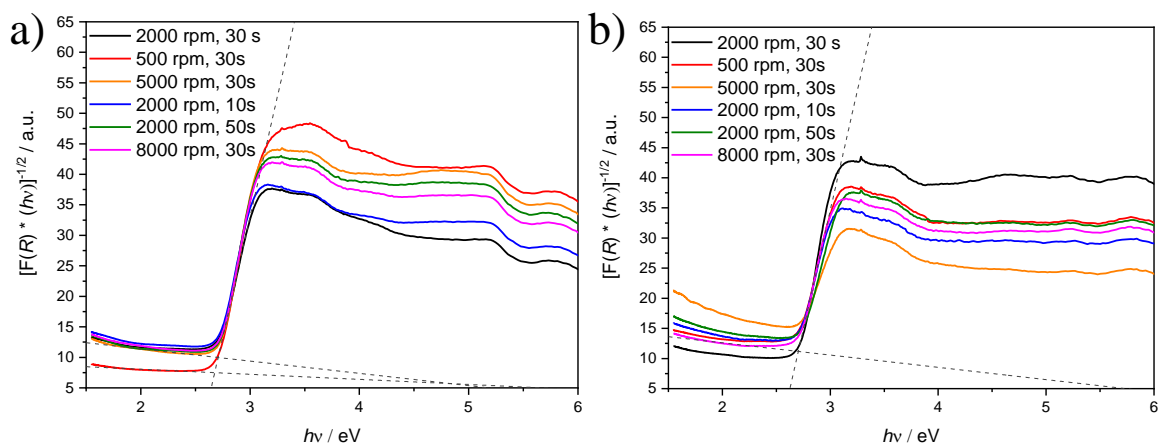

**Figure S5.** Tauc-plots of  $\text{WO}_3$  photoanodes grown from seed layers prepared via a) static spin coating and b) dynamic spin coating.

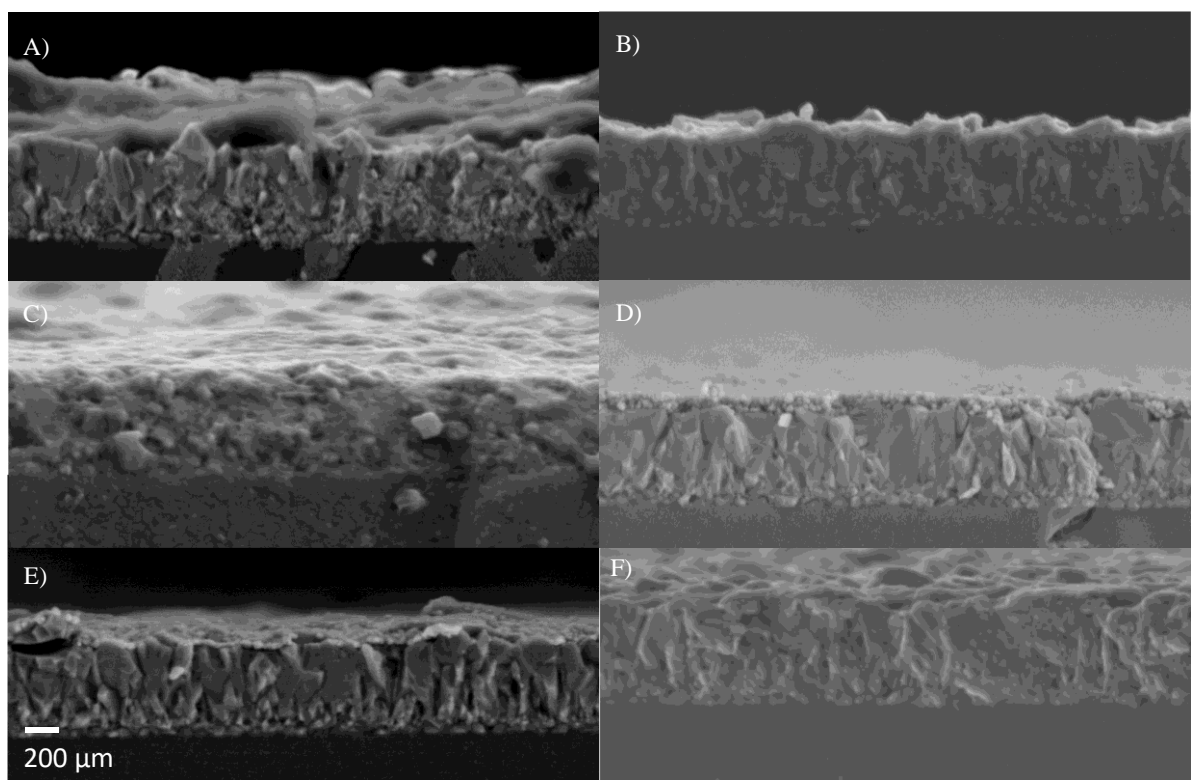

**Figure S6.** Cross Section SEM images of the seed layer prepared by dynamic spin coating.

**Table S2:** XPS results of the measured seed layers synthesized via dynamic spin coating.

|   | Dynamic Spin Coating |          |             |
|---|----------------------|----------|-------------|
|   | W / At%              | Sn / At% | W/ Sn ratio |
| A | 7.69                 | 10.18    | 0.76        |
| B | 10.21                | 9.1      | 1.12        |
| C | 11.2                 | 11.71    | 0.96        |
| D | 20.75                | -        |             |
| E | 8.09                 | 15.11    | 0.54        |
| F | 9.92                 | 13.29    | 0.75        |



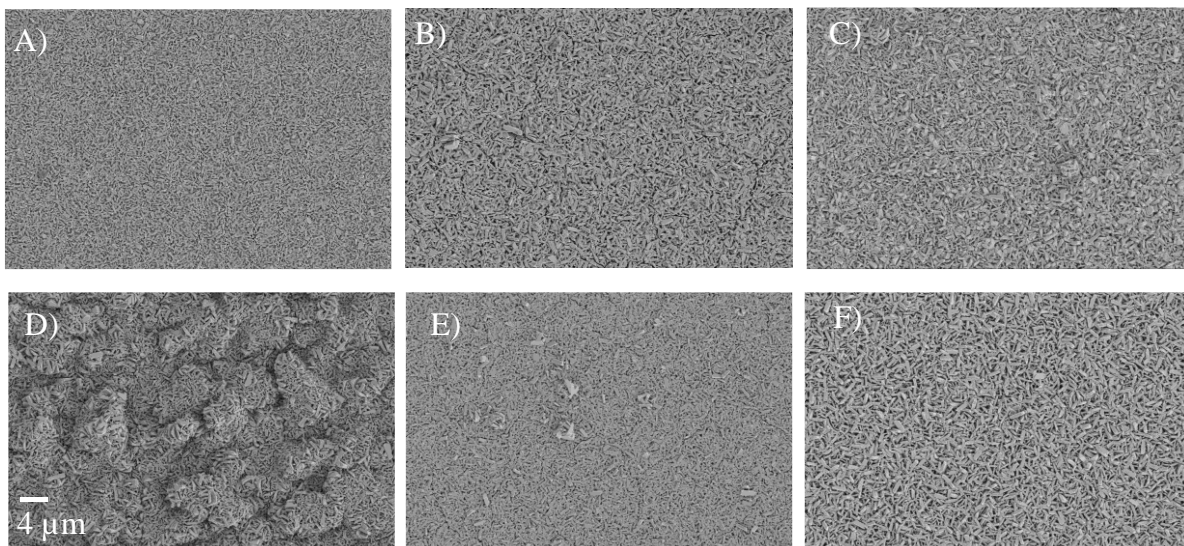

**Figure S7.** Overview SEM images of hydrothermally grown  $\text{WO}_3$  films from seed layer after dynamic spin coating. The scale is the same for every measurement.

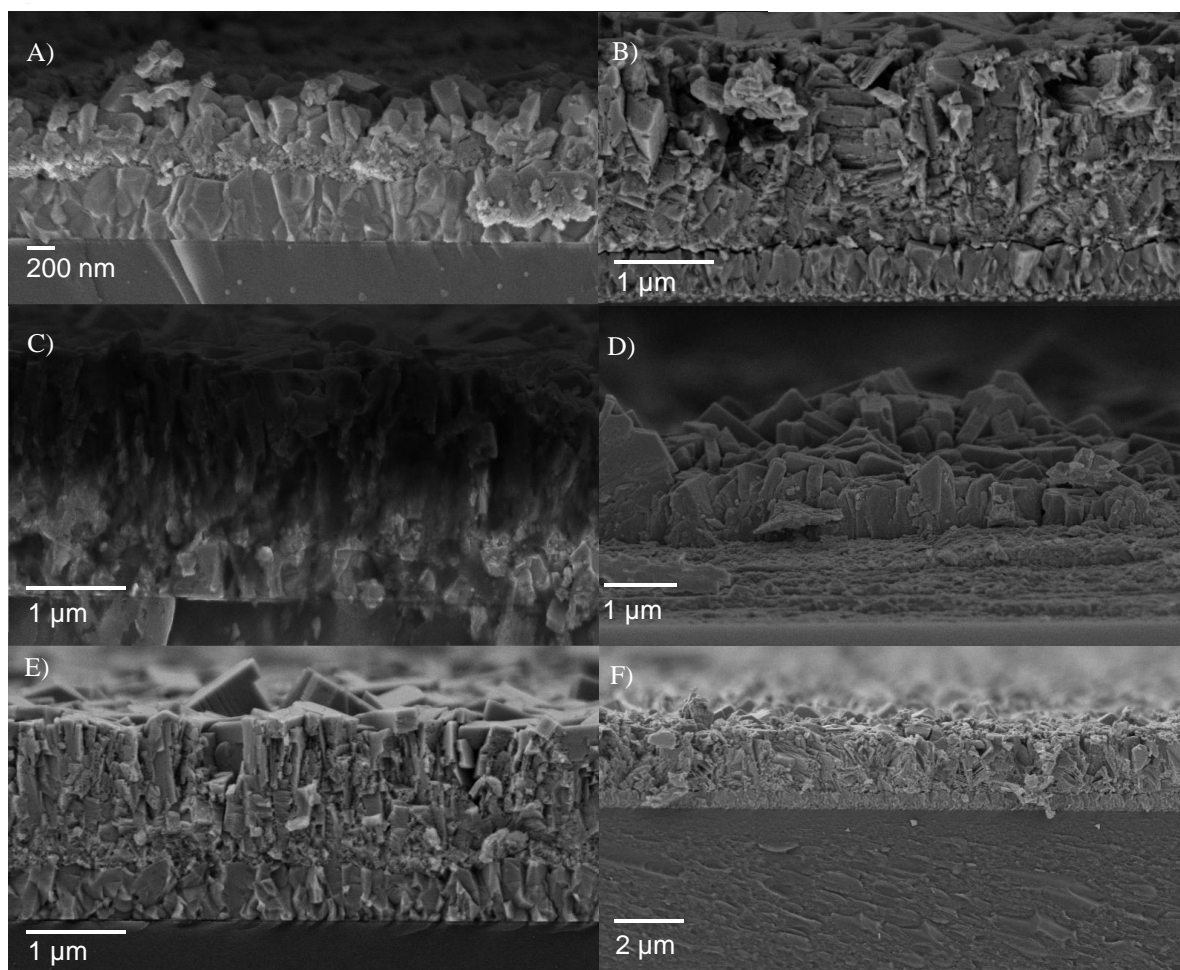

**Figure S8.** Cross Section SEM images grown  $\text{WO}_3$  samples from seed layers after dynamic spin coating.

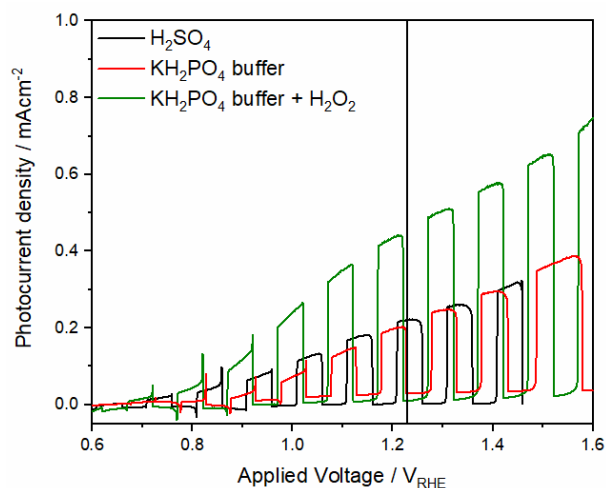

**Figure S9.** CLV in  $\text{KH}_2\text{PO}_4$  as electrolyte with and without  $\text{H}_2\text{O}_2$  as an hole scavenger.

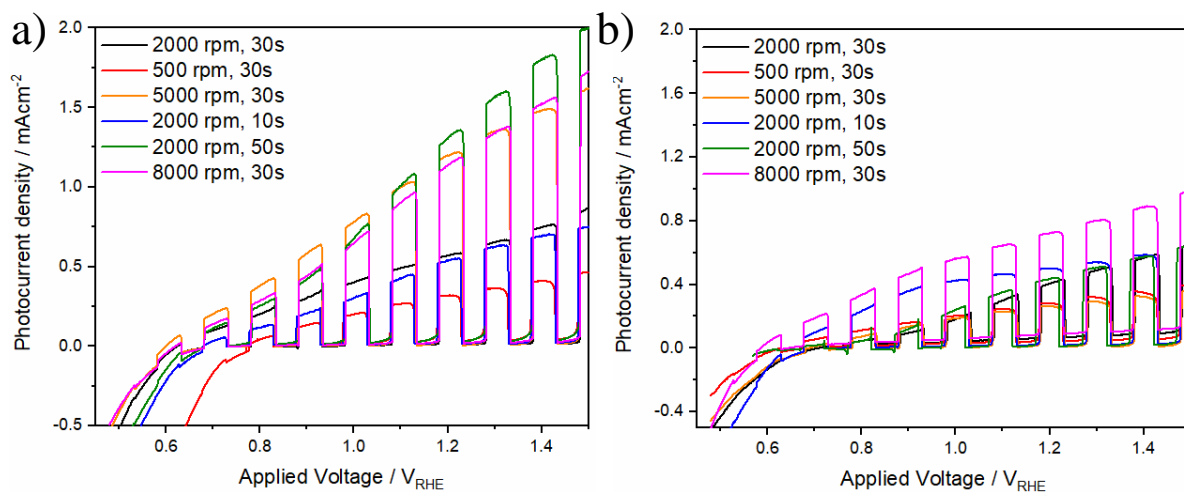

**Figure S10.** CLV in  $\text{KH}_2\text{PO}_4$  as electrolyte with  $\text{H}_2\text{O}_2$  as an hole scavenger for a) static and b) dynamic spin coating.

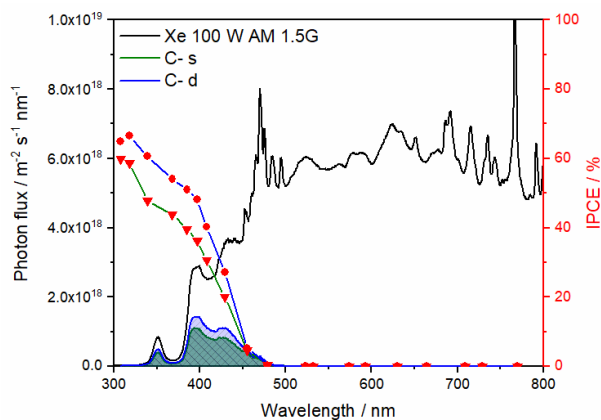

**Figure S11.** Maximum theoretical photocurrent determined by IPCE derived absorption of the photon flux of the used Xe 300W arc lamp with an intensity of  $100 \text{ W cm}^{-2}$  equipped with an AM 1.5 G filter (black line).
